# Supplementary material for: Comparison of the Substrate Preferences of ω3 Fatty Acid Desaturases for Long Chain Polyunsaturated Fatty Acids
Source: MDPI journal article supplement (doi:10.3390/ijms20123058), 2019-06-22
Supplement: s1 [file s1]

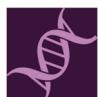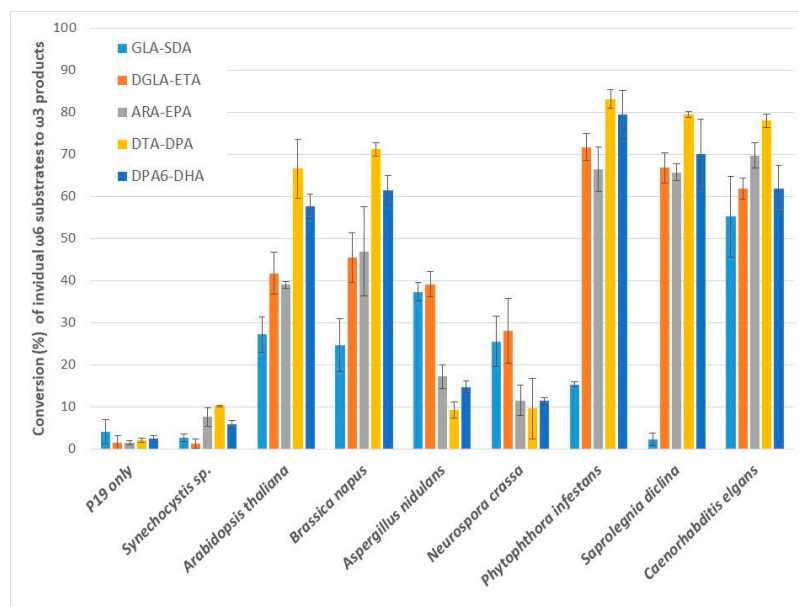

**Supplementary Figure S1.** Summary of  $\omega$ 3D enzymatic activities with the supplied  $\omega$ 6 fatty acid salt substrates.  $\omega$ 3D activities are shown as conversion rates determined by the amounts of  $\omega$ 3 fatty acid products produced from the total amount of  $\omega$ 6 fatty acid substrates. Activity from the p19-only control represents the leaf endogenous  $\omega$ 3D activity. The error bars denote standard deviations of the means from triplicate assays.
